# Supplementary material for: Plasmodium falciparum var genes expressed in children with severe malaria encode CIDRα1 domains
Source: PubMed Central journal article supplement (PMC4967939; doi:10.15252/emmm.201606188), 2016-06-27
Supplement: EMMM-8-839-s001.pdf [file EMMM-8-839-s001.pdf]

## **Appendix**

*Contents:*

*Table S1*

*Table S2*

*Figure S1*

*Figure S2*

*Figure S3*

**Table S1: Distribution (%) of *var* transcripts by DBL $\alpha$  domain type**

|                                                                                                  | <b>Uncomplicated<br/>(n=8)</b> | <b>Severe malaria<br/>(n=36)</b> | <b>P§</b> | <b>Severe anaemia<br/>(n=21)</b> | <b>Cerebral malaria<br/>(n=9)</b> | <b>P§</b> |
|--------------------------------------------------------------------------------------------------|--------------------------------|----------------------------------|-----------|----------------------------------|-----------------------------------|-----------|
| Domain subtypes                                                                                  | Median<br>[IQR]                | Median<br>[IQR]                  |           | Median<br>[IQR]                  | Median<br>[IQR]                   |           |
| DBL $\alpha$ 1                                                                                   | 9<br>[0 - 49]                  | 23<br>[11- 57]                   | 0.32      | 20<br>[7 - 57]                   | 57<br>[21- 77]                    | 0.10      |
| DBL $\alpha$ 1.[1/2/4/7]                                                                         | 4<br>[0 - 9]                   | 19<br>[9 - 57]                   | 0.01      | 18<br>[4- 44]                    | 57<br>[14- 8]                     | 0.12      |
| DBL $\alpha$ 1.5                                                                                 | 0<br>[0 - 0]                   | 0<br>[0 - 0]                     | 0.22      | 0<br>[0 - 0]                     | 0<br>[0 - 0]                      | 0.51      |
| DBL $\alpha$ 1.6                                                                                 | 0<br>[0 - 0]                   | 0<br>[0 - 0]                     | 0.22      | 0<br>[0 - 0]                     | 0<br>[0 - 0]                      | 0.13      |
| DBL $\alpha$ 1.8                                                                                 | 0<br>[0 - 0]                   | 0<br>[0 - 0]                     | 1.00      | 0<br>[0 - 0]                     | 0<br>[0 - 0]                      | 0.44      |
| DBL $\alpha$ 2                                                                                   | 0<br>[0 - 24]                  | 13<br>[0 - 39]                   | 0.24      | 16<br>[0 - 42]                   | 0<br>[0 - 19]                     | 0.21      |
| DBL $\alpha$ 0                                                                                   | 43.7<br>[21.9 - 84.7]          | 20.8<br>[0 - 35.1]               | 0.05      | 14.1<br>[0 - 32.1]               | 23.0<br>[5.4 - 25.8]              | 0.80      |
| VAR1                                                                                             | 0<br>[0 - 2]                   | 0<br>[0 - 0]                     | 1.00      | 0<br>[0 - 0]                     | 0<br>[0 - 0]                      | 0.83      |
| DBL $\alpha$ 1.[1/2/4/7]<br>+DBL $\alpha$ 2 +<br>DBL $\alpha$ 2 prediction*                      | 9<br>[4 - 42]                  | 65<br>[28- 83]                   | 0.005     | 68<br>[28- 84]                   | 63<br>[38- 68]                    | 0.74      |
| DBL $\alpha$ 1.[1/2/4/7] :<br>(DBL $\alpha$ 2+DBL $\alpha$ 2-<br>prediction*) ratio <sup>§</sup> | 1.0<br>[0.2-8.9]               | 0.9<br>[0.3 - 13.6]              | 0.87      | 0.6<br>[0.2 - 3.2]               | 7.0<br>[0.7 - 66.6]               | 0.09      |

§ P values were calculated using Wilcoxon rank sum test

\* Transcripts annotated with a DBL $\alpha$ 1 or DBL $\alpha$ 2 domain or predicted by the DBL $\alpha$  tag sequence to encode a DBL $\alpha$ 2 domain.

§ The patient-wise ratio between the level of transcripts encoding group A type DBL $\alpha$  domains (DBL $\alpha$ 1.[1/2/4/7]) and group B type DBL $\alpha$  domains (DBL $\alpha$ 2) coupled to CIDR $\alpha$ 1.[4-7] and CIDR $\alpha$ 1.[1/8] types, respectively, was calculated as follows:  
 $(\sum \text{DBL}\alpha 1.[1/2/4/7] + 0.01) : (\sum \text{DBL}\alpha 2/\alpha 2\text{-prediction} + 0.01)$ .

**Table S2: Proportions (%) of *var* transcripts encoding the DBL domains listed**

|                  | Uncomplicated<br>( <i>n</i> =8) | Severe malaria<br>( <i>n</i> =36) | P§   |
|------------------|---------------------------------|-----------------------------------|------|
| Domain subtypes# | Median<br>[IQR]                 | Median<br>[IQR]                   |      |
| DBL2β            | 49<br>[20 - 65]                 | 66<br>[40 - 79]                   | 0.17 |
| DBL2β1           | 0<br>[0 - 0]                    | 0<br>[0 - 14]                     | 0.04 |
| DBL2β3           | 0<br>[0 - 34]                   | 12<br>[0 - 26]                    | 0.74 |
| DBL2β5           | 0<br>[0 - 26]                   | 0<br>[0 - 11]                     | 0.57 |
| DBL2β12          | 0<br>[0 - 4]                    | 4<br>[0 - 30]                     | 0.13 |
| DBL2β A type*    | 19<br>[0 - 47]                  | 48<br>[23 - 75]                   | 0.05 |
| DBL2β BC type§   | 5<br>[0 - 41]                   | 0<br>[0 - 16]                     | 0.31 |
| DBL2γ            | 0<br>[0 - 3]                    | 0<br>[0 - 4]                      | 1    |
| DBL2δ            | 34<br>[6 - 41]                  | 7<br>[0 - 22]                     | 0.05 |
| DBLε/ζ           | 11<br>[6 - 62]                  | 4<br>[0 - 20]                     | 0.13 |

# The number before the Greek letter reflects that the domain is the second DBL domain encoded by the gene.

§ P values were calculated using Wilcoxon rank sum test.

\* DBL2β A type: DBLβ [1/3/6/7/9/11/12]. DBLβ12 is part of the group B/A chimeric DC8 PfEMP1; DBLβ12 was here considered a group A domain.

§DBLβBC types: DBLβ[2/4/5/8/10/13]

### Figure S1. Annotation of *var* genes expressed in patients suffering from malaria

Patient ID and clinical symptoms/grouping cerebral malaria (CM), severe anaemia (SA), hyper-parasitaemia (hyper), respiratory distress (RD) or uncomplicated malaria (UM) is shown. Patients who died are also indicated (†). Domain composition of the six most abundant *var* transcripts in each patient is shown. For some genes the long range PCR amplification was not successful and these genes are annotated based on the DBLα-tag sequence (*Group A*, *Group B/C*, *DBLα2 prediction* or *VARI*). Transcript proportions are here given as the un-normalized proportion of the total DBLα-tag sequence read count within the patient.

| Patient | Syndrome(s) | Haemoglobin (g/dL) | Blantyre score | Gene    | Proportion | D1               | D2        | D3     | D4      | D5      | D6      | D7     | D8     | D9     |        |  |  |  |  |
|---------|-------------|--------------------|----------------|---------|------------|------------------|-----------|--------|---------|---------|---------|--------|--------|--------|--------|--|--|--|--|
| 1734    | SA RD       | 3.7                | 5              | 1734-1  | 11%        | DBLa0.11         | CIDRa2.1  | DBLb5  | DBLb1   | CIDRy11 | Intron  |        |        |        |        |  |  |  |  |
|         |             |                    |                | 1734-2  | 9%         | DBLa0.13         | CIDRa2.8  | ...    |         |         |         |        |        |        |        |  |  |  |  |
|         |             |                    |                | 1734-3  | 7%         | Group B/C        |           |        |         |         |         |        |        |        |        |  |  |  |  |
|         |             |                    |                | 1734-4  | 6%         | DBLa0.15         | CIDRa2.10 | DBLb1  | CIDRy7  | ...     |         |        |        |        |        |  |  |  |  |
|         |             |                    |                | 1734-5  | 5%         | DBLa0.4          | CIDRa6    | DBLb5  | DBLy12  | DBLb7   | CIDRy6  | DBLc1  | DBLe14 | Intron |        |  |  |  |  |
|         |             |                    |                | 1734-6  | 4%         | Group B/C        |           |        |         |         |         |        |        |        |        |  |  |  |  |
| 1841    | SA          | 4.9                | 5              | 1841-1  | 26%        | DBLa1.2          | CIDRa1.5a | DBLb6  | DBLy2   | DBLy4   | DBLb1   | CIDRb1 | Intron |        |        |  |  |  |  |
|         |             |                    |                | 1841-2  | 15%        | DBLa2            | CIDRa1.8a | DBLb12 | DBLc3   | DBLe6   | DBLb1   | CIDRb1 | Intron |        |        |  |  |  |  |
|         |             |                    |                | 1841-3  | 14%        | DBLa2            | CIDRa1.1  | DBLb12 | DBLy4   | DBLb1   | CIDRy11 | Intron |        |        |        |  |  |  |  |
|         |             |                    |                | 1841-4  | 11%        | DBLa2 prediction |           |        |         |         |         |        |        |        |        |  |  |  |  |
|         |             |                    |                | 1841-5  | 9%         | Group A          |           |        |         |         |         |        |        |        |        |  |  |  |  |
|         |             |                    |                | 1841-6  | 6%         | Group A          |           |        |         |         |         |        |        |        |        |  |  |  |  |
| 1861    | SA          | 4.7                | 5              | 1861-1  | 36%        | Group B/C        |           |        |         |         |         |        |        |        |        |  |  |  |  |
|         |             |                    |                | 1861-2  | 31%        | DBLa2 prediction |           |        |         |         |         |        |        |        |        |  |  |  |  |
|         |             |                    |                | 1861-3  | 8%         | DBLa0.21         | CIDRa2.1  | DBLb1  | CIDRy12 | Intron  |         |        |        |        |        |  |  |  |  |
|         |             |                    |                | 1861-4  | 6%         | DBLa0.8          | CIDRa3.1  | DBLb5  | DBLy10  | DBLb1   | CIDRb6  | Intron |        |        |        |  |  |  |  |
|         |             |                    |                | 1861-5  | 6%         | Group B/C        |           |        |         |         |         |        |        |        |        |  |  |  |  |
|         |             |                    |                | 1861-6  | 4%         | Group A          |           |        |         |         |         |        |        |        |        |  |  |  |  |
| 1869    | SA          | 2.2                | 5              | 1869-1  | 10%        | DBLa0.1          | CIDRa3.2  | DBLb1  | CIDRb1  | Intron  |         |        |        |        |        |  |  |  |  |
|         |             |                    |                | 1869-2  | 8%         | DBLa0.21         | CIDRa2.1  | DBLb2  | DBLb1   | CIDRb6  | DBLy3   | DBLc4  | Intron |        |        |  |  |  |  |
|         |             |                    |                | 1869-3  | 8%         | DBLa2            | CIDRa1.8a | DBLb3  | DBLy11  | DBLc4   | Intron  |        |        |        |        |  |  |  |  |
|         |             |                    |                | 1869-4  | 8%         | DBLa1.1          | CIDRa1.7  | DBLb3  | DBLy2   | DBLy4   | DBLy2   | DBLb1  | CIDRb6 | Intron |        |  |  |  |  |
|         |             |                    |                | 1869-5  | 8%         | DBLa1.4          | CIDRa1.3  | DBLb1  | DBLy15  | DBLe1   | DBLy8   | DBLc1  | DBLe5  | Intron |        |  |  |  |  |
|         |             |                    |                | 1869-6  | 6%         | Group B/C        |           |        |         |         |         |        |        |        |        |  |  |  |  |
| 1920    | SA †        | 4.8                | 4              | 1920-1  | 59%        | DBLa2            | CIDRa1.1  | DBLb12 | DBLy6   | DBLb4   | CIDRb1  | Intron |        |        |        |  |  |  |  |
|         |             |                    |                | 1920-2  | 10%        | DBLa1.7          | CIDRa1.4  | DBLb3  | DBLy2   | DBLy4   | Intron  |        |        |        |        |  |  |  |  |
|         |             |                    |                | 1920-3  | 8%         | DBLa2 prediction |           |        |         |         |         |        |        |        |        |  |  |  |  |
|         |             |                    |                | 1920-4  | 5%         | Group A          |           |        |         |         |         |        |        |        |        |  |  |  |  |
|         |             |                    |                | 1920-5  | 3%         | Group A          |           |        |         |         |         |        |        |        |        |  |  |  |  |
|         |             |                    |                | 1920-6  | 3%         | Group A          |           |        |         |         |         |        |        |        |        |  |  |  |  |
| 1922    | SA          | 3.7                | 5              | 1922-1  | 31%        | Group B/C        |           |        |         |         |         |        |        |        |        |  |  |  |  |
|         |             |                    |                | 1922-2  | 21%        | DBLa0.19         | CIDRa6    | DBLb1  | CIDRb1  | Intron  |         |        |        |        |        |  |  |  |  |
|         |             |                    |                | 1922-4  | 16%        | DBLa0.19 ...     |           |        |         |         |         |        |        |        |        |  |  |  |  |
|         |             |                    |                | 1922-3  | 15%        | DBLa0.6          | CIDRa3.1  | DBLb5  | DBLy13  | DBLb1   | CIDRb1  | Intron |        |        |        |  |  |  |  |
|         |             |                    |                | 1922-5  | 12%        | DBLa0.5          | CIDRa2.6  | DBLy2  | DBLb1   | CIDRb1  | ...     |        |        |        |        |  |  |  |  |
|         |             |                    |                | 1922-6  | 3%         | Group B/C        |           |        |         |         |         |        |        |        |        |  |  |  |  |
| 1931    | SA          | 3.8                | 5              | 1931-1  | 24%        | DBLa0.15         | CIDRa3.1  | DBLb5  | DBLy9   | DBLb1   | CIDRy9  | DBLe2  | DBLc3  | DBLe6  | Intron |  |  |  |  |
|         |             |                    |                | 1931-2  | 21%        | DBLa2 prediction |           |        |         |         |         |        |        |        |        |  |  |  |  |
|         |             |                    |                | 1931-3  | 10%        | DBLa0.6          | CIDRa3.1  | DBLy5  | DBLb1   | CIDRb1  | Intron  |        |        |        |        |  |  |  |  |
|         |             |                    |                | 1931-4  | 8%         | DBLa0.13         | CIDRa2.3  | DBLb3  | DBLy5   | DBLb1   | CIDRb5  | Intron |        |        |        |  |  |  |  |
|         |             |                    |                | 1931-5  | 7%         | DBLa2            | CIDRa1.1  | DBLb3  | DBLy13  | DBLc2   | DBLe4   | Intron |        |        |        |  |  |  |  |
|         |             |                    |                | 1931-6  | 6%         | Group A          |           |        |         |         |         |        |        |        |        |  |  |  |  |
| 1939    | SA          | 4.1                | 5              | 1939-1  | 24%        | DBLa1.7          | CIDRa1.4  | DBLb1  | DBLy10  | DBLb1   | CIDRb5  | Intron |        |        |        |  |  |  |  |
|         |             |                    |                | 1939-2  | 22%        | DBLa2            | CIDRa1.1  | DBLb12 | DBLy6   | DBLy4   | DBLc5   | ...    |        |        |        |  |  |  |  |
|         |             |                    |                | 1939-3  | 12%        | DBLa1.1          | CIDRa1.4  | DBLb12 | DBLy2   | DBLy4   | DBLb1   | CIDRb5 | Intron |        |        |  |  |  |  |
|         |             |                    |                | 1939-4  | 7%         | DBLa1.7          | CIDRa1.4  | DBLb1  | DBLb6   | DBLy2   | DBLy11  | DBLb1  | CIDRb1 | Intron |        |  |  |  |  |
|         |             |                    |                | 1939-5  | 6%         | DBLa2            | CIDRa1.8b | DBLb12 | DBLy4   | DBLb1   | CIDRb6  | ...    |        |        |        |  |  |  |  |
|         |             |                    |                | 1939-6  | 5%         | Group A          |           |        |         |         |         |        |        |        |        |  |  |  |  |
| 1965    | SA          | 4.4                | 5              | 1965-1  | 30%        | DBLa2            | CIDRa1.8a | DBLb12 | DBLy4   | DBLb4   | CIDRb1  | ...    |        |        |        |  |  |  |  |
|         |             |                    |                | 1965-3  | 27%        | DBLa2            | CIDRa1.8a | DBLb12 | DBLy4   | ...     |         |        |        |        |        |  |  |  |  |
|         |             |                    |                | 1965-5  | 11%        | DBLa1.2          | CIDRa1.5b | DBLb3  | DBLy17  | DBLy14  | DBLc5   | DBLe4  | Intron |        |        |  |  |  |  |
|         |             |                    |                | 1965-2  | 9%         | DBLa1.2          | CIDRa1.5a | DBLy17 | DBLb5   | CIDRb4  | DBLb6   | DBLy13 | Intron |        |        |  |  |  |  |
|         |             |                    |                | 1965-7  | 6%         | DBLa1.2          | CIDRa1.6b | DBLb3  | DBLy12  | DBLb5   | CIDRb4  | DBLe2  | ...    |        |        |  |  |  |  |
|         |             |                    |                | 1965-11 | 5%         | Group A          |           |        |         |         |         |        |        |        |        |  |  |  |  |
| 1971    | SA          | 3.3                | 5              | 1971-1  | 21%        | DBLa0.5          | CIDRa2.5  | DBLb1  | CIDRb1  | DBLc6   | DBLe6   | Intron |        |        |        |  |  |  |  |
|         |             |                    |                | 1971-2  | 14%        | Group A          |           |        |         |         |         |        |        |        |        |  |  |  |  |
|         |             |                    |                | 1971-3  | 12%        | DBLa2            | CIDRa1.8a | DBLb12 | DBLc1   | DBLe6   | DBLb1   | CIDRb1 | Intron |        |        |  |  |  |  |
|         |             |                    |                | 1971-4  | 12%        | DBLa1.2          | CIDRa1.4  | DBLb7  | DBLy13  | DBLb7   | CIDRb4  | DBLb7  | DBLy2  | ...    |        |  |  |  |  |
|         |             |                    |                | 1971-5  | 11%        | DBLa2            | CIDRa1.1  | DBLb12 | DBLy4   | DBLb1   | CIDRy11 | Intron |        |        |        |  |  |  |  |
|         |             |                    |                | 1971-6  | 6%         | Group A          |           |        |         |         |         |        |        |        |        |  |  |  |  |
| 2021    | SA          | 4.4                | 5              | 2021-1  | 21%        | DBLa0.13         | CIDRa2.3  | DBLb1  | CIDRy5  | Intron  |         |        |        |        |        |  |  |  |  |
|         |             |                    |                | 2021-2  | 9%         | DBLa1.1          | CIDRa1.7  | DBLb1  | DBLy16  | DBLy2   | DBLb1   | CIDRb1 | Intron |        |        |  |  |  |  |
|         |             |                    |                | 2021-3  | 8%         | DBLa0.9          | CIDRa2.7  | DBLb1  | CIDRb1  | Intron  |         |        |        |        |        |  |  |  |  |
|         |             |                    |                | 2021-5  | 7%         | DBLa0.19         | CIDRa3.4  | ...    |         |         |         |        |        |        |        |  |  |  |  |
|         |             |                    |                | 2021-4  | 6%         | DBLa0.18         | CIDRa4    | DBLb5  | DBLb1   | ...     |         |        |        |        |        |  |  |  |  |
|         |             |                    |                | 2021-6  | 5%         | Group B/C        |           |        |         |         |         |        |        |        |        |  |  |  |  |
| 2052    | SA          | 3.4                | 5              | 2052-1  | 21%        | DBLa1.8          | CIDRb4    | DBLy2  | DBLy11  | Intron  |         |        |        |        |        |  |  |  |  |
|         |             |                    |                | 2052-2  | 17%        | DBLa2            | CIDRa1.1  | DBLb12 | DBLy6   | DBLb1   | CIDRb1  | Intron |        |        |        |  |  |  |  |
|         |             |                    |                | 2052-3  | 13%        | DBLa1.8          | CIDRb2    | DBLy7  | DBLe11  | DBLc3   | DBLe6   | Intron |        |        |        |  |  |  |  |
|         |             |                    |                | 2052-4  | 7%         | DBLa0.9          | CIDRa2.2  | DBLb1  | CIDRb1  | Intron  |         |        |        |        |        |  |  |  |  |
|         |             |                    |                | 2052-5  | 6%         | DBLa1.1          | CIDRa1.2  | DBLb11 | DBLy1   | DBLe1   | DBLy8   | DBLc1  | DBLe5  | Intron |        |  |  |  |  |
|         |             |                    |                | 2052-6  | 6%         | Group B/C        |           |        |         |         |         |        |        |        |        |  |  |  |  |
| 2083    | SA          | 4.1                | 5              | 2083-1  | 21%        | DBLa1.1          | CIDRa1.7  | DBLb1  | DBLy2   | DBLy4   | DBLy2   | DBLc3  | DBLe6  | Intron |        |  |  |  |  |
|         |             |                    |                | 2083-2  | 13%        | DBLa1.2          | CIDRa1.7  | DBLb3  | DBLb6   | DBLy13  | DBLb1   | CIDRb6 | Intron |        |        |  |  |  |  |
|         |             |                    |                | 2083-3  | 13%        | DBLa2            | CIDRa1.8a | DBLb12 | DBLy17  | DBLb1   | CIDRb5  | Intron |        |        |        |  |  |  |  |
|         |             |                    |                | 2083-4  | 13%        | DBLa2            | CIDRa1.1  | DBLb1  | DBLy16  | DBLy14  | ...     |        |        |        |        |  |  |  |  |
|         |             |                    |                | 2083-5  | 10%        | DBLa1.2          | CIDRa1.6a | DBLb12 | DBLy6   | DBLy2   | DBLb1   | CIDRb6 | Intron |        |        |  |  |  |  |
|         |             |                    |                | 2083-6  | 7%         | Group A          |           |        |         |         |         |        |        |        |        |  |  |  |  |
| 2110    | SA RD       | 1.7                | 5              | 2110-1  | 39%        | DBLa1.2          | CIDRa1.5a | DBLb9  | DBLe13  | DBLy11  | DBLb7   | CIDRb4 | Intron |        |        |  |  |  |  |
|         |             |                    |                | 2110-2  | 15%        | DBLa0.18         | CIDRa6    | DBLb5  | DBLb1   | ...     |         |        |        |        |        |  |  |  |  |
|         |             |                    |                | 2110-3  | 15%        | DBLa2            | CIDRa1.1  | DBLb12 | DBLy6   | DBLb1   | CIDRb5  | Intron |        |        |        |  |  |  |  |
|         |             |                    |                | 2110-4  | 12%        | VAR1             |           |        |         |         |         |        |        |        |        |  |  |  |  |
|         |             |                    |                | 2110-5  | 7%         | Group A          |           |        |         |         |         |        |        |        |        |  |  |  |  |
|         |             |                    |                | 2110-6  | 6%         | Group A          |           |        |         |         |         |        |        |        |        |  |  |  |  |

| Patient | Syndrome(s)    | Haemoglobin (g/dl) | Blantyre score | Gene    | Proportion | D1               | D2        | D3     | D4      | D5     | D6     | D7     | D8     | D9     |        |  |  |
|---------|----------------|--------------------|----------------|---------|------------|------------------|-----------|--------|---------|--------|--------|--------|--------|--------|--------|--|--|
| 2114    | SA             | 3.8                | 5              | 2114-1  | 25%        | DBLa0.11         | CIDRa2.4  | DBLs1  | CIDRb1  | Intron |        |        |        |        |        |  |  |
|         |                |                    |                | 2114-2  | 19%        | DBLa1.1          | CIDRa1.7  | DBLb11 | DBLy2   | DBLy9  | DBLs1  | CIDRb3 | Intron |        |        |  |  |
|         |                |                    |                | 2114-3  | 16%        | DBLa0.9          | ...       |        |         |        |        |        |        |        |        |  |  |
|         |                |                    |                | 2114-4  | 16%        | Group A          |           |        |         |        |        |        |        |        |        |  |  |
|         |                |                    |                | 2114-5  | 8%         | DBLa1.5          | CIDRb1    | DBLb3  | DBLy12  | DBLy2  | Intron |        |        |        |        |  |  |
|         |                |                    |                | 2114-6  | 3%         | Group A          |           |        |         |        |        |        |        |        |        |  |  |
| 2120    | SA             | 3.9                | 5              | 2120-1  | 89%        | DBLa2 prediction |           |        |         |        |        |        |        |        |        |  |  |
|         |                |                    |                | 2120-2  | 9%         | DBLa1.7          | CIDRa3    | DBLb6  | DBLy2   | DBLy11 | ...    |        |        |        |        |  |  |
|         |                |                    |                | 2120-3  | 2%         | DBLa1.4          | CIDRa1.3  | DBLb1  | DBLy15  | DBLe1  | DBLy8  | DBLc2  | DBLe5  | Intron | VAR1   |  |  |
|         |                |                    |                | 2121-1  | 19%        | Group A          |           |        |         |        |        |        |        |        |        |  |  |
|         |                |                    |                | 2121-2  | 14%        | DBLa2            | CIDRa1.1  | DBLb1  | DBLy4   | DBLs1  | CIDRb6 | Intron |        |        |        |  |  |
|         |                |                    |                | 2121-3  | 9%         | Group A          |           |        |         |        |        |        |        |        |        |  |  |
| 2121    | SA             | 4.5                | 5              | 2121-4  | 6%         | DBLa0.11         | CIDRa2.4  | DBLs1  | CIDRb1  | Intron |        |        |        |        |        |  |  |
|         |                |                    |                | 2121-5  | 5%         | Group A          |           |        |         |        |        |        |        |        |        |  |  |
|         |                |                    |                | 2121-6  | 5%         | Group A          |           |        |         |        |        |        |        |        |        |  |  |
|         |                |                    |                | 2132-1  | 23%        | DBLa1.7          | CIDRa1.4  | DBLb3  | DBLb7   | DBLs1  | CIDRy9 | Intron |        |        |        |  |  |
|         |                |                    |                | 2132-2  | 17%        | DBLa1.7          | CIDRa1.4  | DBLb1  | DBLy13  | DBLy12 | DBLs5  | CIDRb4 | DBLb9  | DBLy9  | Intron |  |  |
|         |                |                    |                | 2132-3  | 10%        | DBLa1.1          | CIDRa1.7  | DBLb1  | DBLy2   | DBLy4  | DBLy2  | DBLc3  | DBLe6  | Intron |        |  |  |
| 2132    | SA RD          | 4.4                | 3              | 2132-4  | 7%         | DBLa0.1          | CIDRa3.4  | ...    |         |        |        |        |        |        |        |  |  |
|         |                |                    |                | 2132-5  | 5%         | DBLa1.2          | CIDRa1.1  | DBLb12 | DBLy11  | DBLy6  | Intron |        |        |        |        |  |  |
|         |                |                    |                | 2132-6  | 4%         | Group B/C        |           |        |         |        |        |        |        |        |        |  |  |
|         |                |                    |                | 2142-1  | 42%        | DBLa2            | CIDRa1.1  | DBLb12 | DBLy4   | DBLs1  | CIDRb1 | Intron |        |        |        |  |  |
|         |                |                    |                | 2142-2  | 12%        | DBLa0.6          | CIDRa3.4  | DBLs5  | DBLy16  | DBLs1  | CIDRb1 | Intron |        |        |        |  |  |
|         |                |                    |                | 2142-3  | 11%        | DBLa2            | CIDRa1.1  | DBLb12 | DBLy4   | DBLs1  | CIDRb1 | Intron |        |        |        |  |  |
| 2142    | SA             | 3.4                | 5              | 2142-4  | 7%         | DBLa2            | CIDRa1.8a | DBLb12 | DBLy4   | DBLc3  | DBLe12 | Intron |        |        |        |  |  |
|         |                |                    |                | 2142-5  | 5%         | DBLa1.4          | CIDRy3    | DBLb6  | DBLy2   | DBLy12 | DBLs1  | CIDRb1 | Intron |        |        |  |  |
|         |                |                    |                | 2142-6  | 5%         | Group A          |           |        |         |        |        |        |        |        |        |  |  |
|         |                |                    |                | 2157-1  | 17%        | DBLa1.8          | CIDRb2    | DBLy7  | DBLe11  | DBLc2  | DBLe6  | Intron |        |        |        |  |  |
|         |                |                    |                | 2157-2  | 17%        | DBLa1.7          | CIDRa1.4  | DBLb3  | DBLy2   | DBLy12 | DBLs5  | CIDRb5 | Intron |        |        |  |  |
|         |                |                    |                | 2157-3  | 15%        | DBLa2            | CIDRa1.8b | DBLb12 | DBLs5   | DBLs1  | CIDRb1 | Intron |        |        |        |  |  |
| 2157    | SA RD          | 3.8                | 3              | 2157-4  | 7%         | Group A          |           |        |         |        |        |        |        |        |        |  |  |
|         |                |                    |                | 2157-5  | 6%         | DBLa2 prediction |           |        |         |        |        |        |        |        |        |  |  |
|         |                |                    |                | 2157-6  | 5%         | Group B/C        |           |        |         |        |        |        |        |        |        |  |  |
|         |                |                    |                | 2268-1  | 59%        | DBLa2            | CIDRa1.1  | DBLb3  | DBLy14  | DBLc5  | DBLe4  | Intron |        |        |        |  |  |
|         |                |                    |                | 2268-2  | 21%        | DBLa1.4          | CIDRa1.3  | DBLb1  | DBLy15  | DBLe1  | DBLy8  | DBLc2  | DBLe5  | Intron | VAR1   |  |  |
|         |                |                    |                | 2268-3  | 4%         | Group B/C        |           |        |         |        |        |        |        |        |        |  |  |
| 2268    | SA             | 4.5                | 5              | 2268-4  | 3%         | Group B/C        |           |        |         |        |        |        |        |        |        |  |  |
|         |                |                    |                | 2268-5  | 3%         | Group B/C        |           |        |         |        |        |        |        |        |        |  |  |
|         |                |                    |                | 2268-6  | 3%         | Group B/C        |           |        |         |        |        |        |        |        |        |  |  |
|         |                |                    |                | 1873-1  | 42%        | Group B/C        |           |        |         |        |        |        |        |        |        |  |  |
|         |                |                    |                | 1873-4  | 23%        | DBLa2            | CIDRa1.1  | DBLb12 | DBLy13  | DBLs1  | CIDRb1 | Intron |        |        |        |  |  |
|         |                |                    |                | 1873-2  | 19%        | DBLa2            | CIDRa1.1  | DBLb3  | DBLy16  | DBLs5  | CIDRb4 | DBLb7  | DBLy12 | Intron |        |  |  |
| 1873    | CM RD          | N/A                | 0              | 1873-3  | 9%         | DBLa0.13         | CIDRa2.3  | DBLs1  | CIDRb7  | Intron |        |        |        |        |        |  |  |
|         |                |                    |                | 1873-5  | 4%         | VAR1             |           |        |         |        |        |        |        |        |        |  |  |
|         |                |                    |                | 1873-6  | 2%         | Group B/C        |           |        |         |        |        |        |        |        |        |  |  |
|         |                |                    |                | 1890-1  | 24%        | DBLa0.11         | CIDRa2.4  | DBLs1  | CIDRb1  | Intron |        |        |        |        |        |  |  |
|         |                |                    |                | 1890-2  | 18%        | DBLa1.2          | CIDRa1.5a | DBLb3  | DBLy12  | DBLs5  | CIDRb4 | DBLb9  | DBLy6  | Intron |        |  |  |
|         |                |                    |                | 1890-3  | 15%        | DBLa2            | CIDRa1.1  | DBLb5  | DBLs1   | CIDRb1 | Intron |        |        |        |        |  |  |
| 1890    | Hyper          | 6.8                | 5              | 1890-4  | 10%        | DBLa2 prediction |           |        |         |        |        |        |        |        |        |  |  |
|         |                |                    |                | 1890-5  | 5%         | DBLa1.7          | CIDRa1.4  | DBLb3  | DBLb3   | DBLy11 | ...    |        |        |        |        |  |  |
|         |                |                    |                | 1890-6  | 3%         | Group A          |           |        |         |        |        |        |        |        |        |  |  |
|         |                |                    |                | 1914-21 | 37%        | DBLa1.7          | CIDRa1.4  | DBLb1  | DBLb6   | DBLy11 | DBLs1  | CIDRy9 | Intron |        |        |  |  |
|         |                |                    |                | 1914-14 | 26%        | DBLa1.7          | CIDRa1.7  | DBLb6  | DBLy2   | DBLy6  | DBLs4  | CIDRb1 | Intron |        |        |  |  |
|         |                |                    |                | 1914-12 | 22%        | DBLa1.8          | CIDRy3    | DBLy7  | DBLs5   | CIDRb3 | DBLb9  | DBLy11 | ...    |        |        |  |  |
| 1914    | CM Hyper       | 6.9                | 2              | 1914-20 | 4%         | DBLa0.10         | CIDRa2.2  | DBLs1  | CIDRy11 | Intron |        |        |        |        |        |  |  |
|         |                |                    |                | 1914-16 | 2%         | Group B/C        |           |        |         |        |        |        |        |        |        |  |  |
|         |                |                    |                | 1914-27 | 2%         | Group B/C        |           |        |         |        |        |        |        |        |        |  |  |
|         |                |                    |                | 1918-1  | 26%        | DBLa1.2          | CIDRa1.5a | DBLb7  | DBLy10  | DBLy11 | DBLy4  | DBLs1  | CIDRb4 | ...    |        |  |  |
|         |                |                    |                | 1918-2  | 17%        | DBLa1.7          | CIDRa1.4  | DBLb3  | DBLy11  | DBLy2  | DBLs1  | CIDRb1 | Intron |        |        |  |  |
|         |                |                    |                | 1918-5  | 9%         | DBLa1.2          | CIDRa1.5b | DBLy17 | DBLs5   | CIDRb3 | DBLb7  | DBLy2  | Intron |        |        |  |  |
| 1918    | CM             | N/A                | 0              | 1918-3  | 9%         | DBLa1.2          | CIDRa1.4  | DBLb1  | DBLb7   | DBLy13 | DBLs6  | CIDRb2 | Intron |        |        |  |  |
|         |                |                    |                | 1918-4  | 8%         | DBLa2            | CIDRa1.1  | DBLb12 | DBLy11  | DBLs1  | CIDRb1 | Intron |        |        |        |  |  |
|         |                |                    |                | 1918-6  | 4%         | Group A          |           |        |         |        |        |        |        |        |        |  |  |
|         |                |                    |                | 1919-1  | 59%        | DBLa2            | CIDRa1.1  | DBLb12 | DBLy6   | DBLs4  | ...    |        |        |        |        |  |  |
|         |                |                    |                | 1919-2  | 21%        | DBLa1.7          | CIDRa1.4  | DBLb3  | DBLy2   | DBLy4  | Intron |        |        |        |        |  |  |
|         |                |                    |                | 1919-3  | 10%        | DBLa1.7          | CIDRa1.7  | DBLb1  | DBLy11  | DBLs1  | CIDRy9 | Intron |        |        |        |  |  |
| 1919    | CM SA RD Hyper | 3.4                | 2              | 1919-4  | 7%         | DBLa2            | CIDRa1.1  | DBLb12 | DBLy4   | DBLy14 | DBLc5  | DBLe4  | Intron |        |        |  |  |
|         |                |                    |                | 1919-5  | 3%         | Group A          |           |        |         |        |        |        |        |        |        |  |  |
|         |                |                    |                | 1945-2  | 14%        | Group A          |           |        |         |        |        |        |        |        |        |  |  |
|         |                |                    |                | 1945-1  | 12%        | DBLa1.2          | CIDRa1.7  | DBLb3  | DBLy2   | DBLy11 | DBLy2  | DBLs1  | CIDRb1 | Intron |        |  |  |
|         |                |                    |                | 1945-4  | 8%         | DBLa0.1          | ...       |        |         |        |        |        |        |        |        |  |  |
|         |                |                    |                | 1945-3  | 8%         | DBLa1.8          | CIDRy3    | DBLy7  | DBLc5   | DBLe11 | DBLe12 | Intron |        |        |        |  |  |
| 1945    | CM             | 7.5                | 0              | 1945-5  | 8%         | DBLa2            | CIDRa1.8b | DBLb12 | DBLy4   | DBLs1  | CIDRb5 | Intron |        |        |        |  |  |
|         |                |                    |                | 1945-6  | 7%         | Group A          |           |        |         |        |        |        |        |        |        |  |  |
|         |                |                    |                | 1950-1  | 30%        | DBLa1.2          | CIDRa1.5a | DBLb6  | DBLy11  | ...    |        |        |        |        |        |  |  |
|         |                |                    |                | 1950-2  | 9%         | DBLa1.2          | CIDRa1.6b | DBLb3  | DBLy14  | DBLs1  | CIDRb1 | Intron |        |        |        |  |  |
|         |                |                    |                | 1950-3  | 6%         | DBLa0.24         | CIDRa6    | DBLs1  | CIDRb1  | Intron |        |        |        |        |        |  |  |
|         |                |                    |                | 1950-4  | 5%         | Group B/C        |           |        |         |        |        |        |        |        |        |  |  |
| 1950    | CM †           | 6.1                | 2              | 1950-5  | 5%         | Group B/C        |           |        |         |        |        |        |        |        |        |  |  |
|         |                |                    |                | 1950-6  | 4%         | Group B/C        |           |        |         |        |        |        |        |        |        |  |  |
|         |                |                    |                | 1974-1  | 14%        | DBLa1.6          | CIDRy3    | DBLy11 | DBLs5   | CIDRb3 | DBLb6  | Intron |        |        |        |  |  |
|         |                |                    |                | 1974-2  | 13%        | DBLa0.11         | CIDRa2.4  | DBLs1  | CIDRb1  | DBLy10 | Intron |        |        |        |        |  |  |
|         |                |                    |                | 1974-3  | 11%        | DBLa1.7          | CIDRa1.4  | DBLb3  | DBLb7   | DBLy2  | DBLy17 | DBLs1  | CIDRb1 | Intron |        |  |  |
|         |                |                    |                | 1974-4  | 9%         | DBLa1.1          | CIDRa1.7  | DBLb1  | DBLy6   | DBLy11 | DBLs1  | CIDRb1 | Intron |        |        |  |  |
| 1974    | CM             | 8.8                | 2              | 1974-5  | 8%         | DBLa1.7          | CIDRa1.4  | DBLb3  | DBLy11  | DBLy11 | DBLy6  | DBLs1  | CIDRb1 | Intron |        |  |  |
|         |                |                    |                | 1974-6  | 6%         | Group B/C        |           |        |         |        |        |        |        |        |        |  |  |

| Patient | Syndrome(s)           | Haemoglobin (g/dL) | Blantyre score | Gene    | Proportion | D1               | D2        | D3     | D4     | D5      | D6     | D7     | D8     | D9     |      |  |
|---------|-----------------------|--------------------|----------------|---------|------------|------------------|-----------|--------|--------|---------|--------|--------|--------|--------|------|--|
| 1983    | CM SA RD              | 5                  | 1              | 1983-4  | 10%        | DBL1.1           | CIDRa1.5a | DBL83  | DBLy12 | DBL45   | CIDR83 | DBL87  | DBLy2  | Intron |      |  |
|         |                       |                    |                | 1983-3  | 10%        | DBLa2            | CIDRa1.1  | DBL812 | DBLy12 | DBL61   | CIDR81 | Intron |        |        |      |  |
|         |                       |                    |                | 1983-9  | 10%        | DBLa0.15         | CIDRa2.5  | DBL61  | CIDR81 | Intron  |        |        |        |        |      |  |
|         |                       |                    |                | 1983-1  | 9%         | DBLa2            | CIDRa1.1  | DBL812 | DBLy4  | DBL61   | CIDR81 | ...    |        |        |      |  |
|         |                       |                    |                | 1983-7  | 6%         | DBLa1.4          | CIDRa1.7  | DBL81  | DBL87  | DBLy5   | DBLy11 | DBL61  | CIDR84 | Intron |      |  |
|         |                       |                    |                | 1983-13 | 6%         | DBLa1.2          | CIDRa1.5b | DBL86  | DBLy17 | DBLy14  | DBL75  | DBLe4  | Intron |        |      |  |
| 1994    | CM                    | 5.8                | 2              | 1994-1  | 23%        | Group B/C        |           |        |        |         |        |        |        |        |      |  |
|         |                       |                    |                | 1994-2  | 14%        | DBLa1.7          | CIDRa1.4  | DBL83  | DBLy13 | DBLy2   | DBLy4  | DBL61  | CIDR81 | Intron |      |  |
|         |                       |                    |                | 1994-3  | 10%        | DBLa0.9          | CIDRa2.2  | DBL61  | CIDR81 | Intron  |        |        |        |        |      |  |
|         |                       |                    |                | 1994-4  | 9%         | Group A          |           |        |        |         |        |        |        |        |      |  |
|         |                       |                    |                | 1994-5  | 7%         | Group B/C        |           |        |        |         |        |        |        |        |      |  |
|         |                       |                    |                | 1994-6  | 5%         | Group B/C        |           |        |        |         |        |        |        |        |      |  |
| 1995    | CM SA RD              | 3.7                | 1              | 1995-2  | 18%        | DBLa0.5          | CIDRa2.3  | DBL810 | DBLy5  | DBL61   | ...    |        |        |        |      |  |
|         |                       |                    |                | 1995-1  | 17%        | DBLa0.5          | CIDRa2.3  | DBL61  | CIDR81 | ...     |        |        |        |        |      |  |
|         |                       |                    |                | 1995-3  | 9%         | DBLa0.19         | CIDRa2.9  | DBL61  | CIDR83 | Intron  |        |        |        |        |      |  |
|         |                       |                    |                | 1995-4  | 5%         | Group B/C        |           |        |        |         |        |        |        |        |      |  |
|         |                       |                    |                | 1995-5  | 5%         | Group B/C        |           |        |        |         |        |        |        |        |      |  |
|         |                       |                    |                | 1995-6  | 4%         | Group B/C        |           |        |        |         |        |        |        |        |      |  |
| 1996    | CM SA                 | 4.1                | 2              | 1996-1  | 39%        | DBLa0.18         | CIDRa5    | DBL85  | DBLy13 | DBL63   | CIDRy2 | DBLe4  | Intron |        |      |  |
|         |                       |                    |                | 1996-2  | 13%        | DBLa0.15         | CIDRa3.1  | DBL61  | CIDR81 | Intron  |        |        |        |        |      |  |
|         |                       |                    |                | 1996-3  | 7%         | DBLa1.1          | CIDRa1.7  | DBL83  | DBLy2  | DBLy6   | DBL61  | CIDR81 | Intron |        |      |  |
|         |                       |                    |                | 1996-4  | 4%         | Group A          |           |        |        |         |        |        |        |        |      |  |
|         |                       |                    |                | 1996-5  | 4%         | Group B/C        |           |        |        |         |        |        |        |        |      |  |
|         |                       |                    |                | 1996-6  | 3%         | Group B/C        |           |        |        |         |        |        |        |        |      |  |
| 2014    | CM                    | 8.2                | 2              | 2014-1  | 25%        | DBLa1.7          | CIDRa1.4  | DBL83  | DBLy11 | DBLy2   | DBLy4  | DBLy12 | DBL61  | ...    |      |  |
|         |                       |                    |                | 2014-2  | 6%         | DBLa0.11         | CIDRa2.1  | DBL82  | DBL61  | ...     |        |        |        |        |      |  |
|         |                       |                    |                | 2014-3  | 6%         | DBLa0.13         | CIDRa2.5  | DBL61  | CIDR85 | Intron  |        |        |        |        |      |  |
|         |                       |                    |                | 2014-4  | 6%         | DBLa1.4          | CIDRa1.3  | DBL81  | DBLy15 | DBLe1   | DBLy8  | DBL71  | DBLe5  | Intron | VAR1 |  |
|         |                       |                    |                | 2014-5  | 5%         | DBLa2 prediction |           |        |        |         |        |        |        |        |      |  |
|         |                       |                    |                | 2014-6  | 4%         | DBLa1.1          |           |        |        |         |        |        |        |        |      |  |
| 2053    | CM Hyper              | 10.5               | 2              | 2053-2  | 16%        | DBLa0.3          | CIDRa3.4  | DBL61  | CIDR81 | ...     |        |        |        |        |      |  |
|         |                       |                    |                | 2053-3  | 15%        | DBLa2            | CIDRa1.8b | DBL812 | DBLy4  | DBL61   | CIDR86 | Intron |        |        |      |  |
|         |                       |                    |                | 2053-1  | 13%        | DBLa1.7          | CIDRa1.4  | DBL83  | DBL83  | DBLy11  | DBL61  | CIDR81 | Intron |        |      |  |
|         |                       |                    |                | 2053-4  | 9%         | DBLa0.13         | CIDRa2.3  | DBL85  | DBL61  | CIDR86  | Intron |        |        |        |      |  |
|         |                       |                    |                | 2053-5  | 8%         | DBLa2 prediction |           |        |        |         |        |        |        |        |      |  |
|         |                       |                    |                | 2053-6  | 7%         | Group B/C        |           |        |        |         |        |        |        |        |      |  |
| 2065    | Hyper                 | 5.1                | 5              | 2065-1  | 22%        | DBLa0.8          | CIDRa2.6  | DBL88  | DBL61  | CIDR81  | Intron |        |        |        |      |  |
|         |                       |                    |                | 2065-3  | 19%        | DBLa1.2          | CIDRa1.1  | DBL812 | DBLy11 | DBLy2   | ...    |        |        |        |      |  |
|         |                       |                    |                | 2065-2  | 19%        | DBLa0.22         | CIDRa3.1  | DBL85  | DBLy5  | DBL61   | CIDR81 | Intron |        |        |      |  |
|         |                       |                    |                | 2065-4  | 17%        | DBLa1.1          | CIDRa1.2  | ...    |        |         |        |        |        | VAR1   |      |  |
|         |                       |                    |                | 2065-5  | 7%         | Group B/C        |           |        |        |         |        |        |        |        |      |  |
|         |                       |                    |                | 2065-6  | 6%         | Group B/C        |           |        |        |         |        |        |        |        |      |  |
| 1712    | UM                    | 5.1                | 5              | 1712-1  | 8%         | DBLa1.2          | CIDRa1.5a | DBL86  | DBLy12 | DBL66   | CIDR83 | DBL89  | DBLy11 | ...    |      |  |
|         |                       |                    |                | 1712-2  | 7%         | DBLa2 prediction |           |        |        |         |        |        |        |        |      |  |
|         |                       |                    |                | 1712-3  | 6%         | DBLa0.19         | CIDRa2.10 | DBL810 | DBL61  | CIDR81  | Intron |        |        |        |      |  |
|         |                       |                    |                | 1712-4  | 6%         | DBLa2            | CIDRa1.8b | DBL812 | DBLy4  | DBL61   | CIDR81 | Intron |        |        |      |  |
|         |                       |                    |                | 1712-5  | 5%         | DBLa0.16         | CIDRa3.4  | DBL88  | DBL61  | CIDRy12 | Intron |        |        |        |      |  |
|         |                       |                    |                | 1712-6  | 5%         | Group B/C        |           |        |        |         |        |        |        |        |      |  |
| 1702    | UM                    | 8                  | 5              | 1702-1  | 50%        | DBLa2            | CIDRa1.1  | DBL83  | DBLy11 | DBL4    | ...    |        |        |        |      |  |
|         |                       |                    |                | 1702-2  | 14%        | DBLa0.1          | CIDRa3.1  | DBL61  | CIDR81 | Intron  |        |        |        |        |      |  |
|         |                       |                    |                | 1702-3  | 12%        | DBLa2            | CIDRa1.8b | DBL812 | DBL61  | CIDR81  | Intron |        |        |        |      |  |
|         |                       |                    |                | 1702-4  | 4%         | Group A          |           |        |        |         |        |        |        |        |      |  |
|         |                       |                    |                | 1702-6  | 4%         | DBLa2 prediction |           |        |        |         |        |        |        |        |      |  |
|         |                       |                    |                | 1702-5  | 4%         | VAR1             |           |        |        |         |        |        |        |        |      |  |
| 1678    | UM RD Coma † (sepsis) | 6.5                | 2              | 1678-1  | 70%        | DBLa0.9          | CIDRa2.4  | DBL61  | CIDR81 | DBLy14  | DBL75  | DBLe4  | Intron |        |      |  |
|         |                       |                    |                | 1678-2  | 18%        | DBLa2            | ...       |        |        |         |        |        |        |        |      |  |
|         |                       |                    |                | 1678-3  | 6%         | DBLa0.9          | CIDRa2.7  | DBLy11 | DBL75  | DBLe4   | Intron |        |        |        |      |  |
|         |                       |                    |                | 1678-4  | 3%         | DBLa0.8          | CIDRa2.2  | DBL61  | CIDR81 | Intron  |        |        |        |        |      |  |
|         |                       |                    |                | 1678-5  | 2%         | Group B/C        |           |        |        |         |        |        |        |        |      |  |
|         |                       |                    |                | 1678-6  | 1%         | Group B/C        |           |        |        |         |        |        |        |        |      |  |
| 1715    | UM                    | 8                  | 5              | 1715-1  | 17%        | DBLa0.9          | CIDRa2.2  | DBL61  | CIDRy7 | Intron  |        |        |        |        |      |  |
|         |                       |                    |                | 1715-2  | 8%         | DBLa1.2          | CIDRa1.6b | DBL83  | DBLy11 | DBLy4   | Intron |        |        |        |      |  |
|         |                       |                    |                | 1715-3  | 6%         | DBLa0.18         | CIDRa3.1  | DBL85  | DBL61  | CIDR81  | DBLy3  | DBL4   | Intron |        |      |  |
|         |                       |                    |                | 1715-4  | 6%         | DBLa0.1          | CIDRa3.4  | DBL61  | CIDR85 | Intron  |        |        |        |        |      |  |
|         |                       |                    |                | 1715-5  | 5%         | Group B/C        |           |        |        |         |        |        |        |        |      |  |
|         |                       |                    |                | 1715-6  | 4%         | Group B/C        |           |        |        |         |        |        |        |        |      |  |
| 1878    | UM                    | 5.1                | 5              | 1878-1  | 22%        | DBLa1.5          | CIDR81    | DBL83  | DBLy2  | DBLy9   | ...    |        |        |        |      |  |
|         |                       |                    |                | 1878-2  | 14%        | DBLa0.9          | CIDRa2.2  | DBL61  | CIDRy5 | Intron  |        |        |        |        |      |  |
|         |                       |                    |                | 1878-3  | 11%        | DBLa1.7          | CIDRa1.7  | DBL83  | DBL89  | DBLe13  | DBL61  | ...    |        |        |      |  |
|         |                       |                    |                | 1878-4  | 7%         | Group A          |           |        |        |         |        |        |        |        |      |  |
|         |                       |                    |                | 1878-5  | 6%         | Group A          |           |        |        |         |        |        |        |        |      |  |
|         |                       |                    |                | 1878-6  | 5%         | Group A          |           |        |        |         |        |        |        |        |      |  |
| 1886    | UM                    | 7.8                | 3              | 1886-1  | 17%        | DBLa0.6          | CIDRa3.1  | DBL85  | DBLy18 | DBL61   | CIDR85 | DBLy9  | Intron |        |      |  |
|         |                       |                    |                | 1886-2  | 11%        | DBLa0.18         | CIDRa5    | DBL84  | DBLy16 | DBL4    | Intron |        |        |        |      |  |
|         |                       |                    |                | 1886-3  | 10%        | DBLa0.11         | CIDRa2.4  | DBL61  | CIDR81 | Intron  |        |        |        |        |      |  |
|         |                       |                    |                | 1886-4  | 9%         | DBLa0.12         | CIDRa4    | DBL61  | CIDR81 | Intron  |        |        |        |        |      |  |
|         |                       |                    |                | 1886-5  | 7%         | DBLa1.2          | CIDRa1.6b | DBL87  | DBLy2  | DBLy4   | Intron |        |        |        |      |  |
|         |                       |                    |                | 1886-6  | 5%         | Group B/C        |           |        |        |         |        |        |        |        |      |  |
| 1848    | UM                    | 9.9                | 5              | 1848-1  | 27%        | DBLa0.6          | CIDRa3.1  | DBL85  | DBLy10 | DBL61   | CIDR84 | Intron |        |        |      |  |
|         |                       |                    |                | 1848-2  | 22%        | DBLa0.15         | CIDRa3.2  | DBL61  | CIDR81 | Intron  |        |        |        |        |      |  |
|         |                       |                    |                | 1848-3  | 10%        | DBLa0.14         | CIDRa4    | DBL61  | CIDR87 | Intron  |        |        |        |        |      |  |
|         |                       |                    |                | 1848-4  | 7%         | DBLa0.23         | CIDRa5    | DBL85  | DBLy16 | DBL61   | CIDR81 | ...    |        |        |      |  |
|         |                       |                    |                | 1848-5  | 6%         | DBLa0.4          | CIDRa6    | DBL85  | DBLy9  | DBL72   | DBLe4  | Intron |        |        |      |  |
|         |                       |                    |                | 1848-6  | 5%         | VAR1             |           |        |        |         |        |        |        |        |      |  |
| 1799    | UM RD † (sepsis)      | 5.1                | 3              | 1799-1  | 55%        | DBLa1.6          | CIDRy3    | DBLy7  | DBL61  | CIDRy6  | DBLe13 | DBL75  | DBLe4  | Intron |      |  |
|         |                       |                    |                | 1799-2  | 28%        | DBLa1.6          | CIDR81    | DBLy15 | DBLe1  | DBL73   | DBLe6  | Intron |        |        |      |  |
|         |                       |                    |                | 1799-3  | 4%         | DBLa1.8          | CIDR82    | DBLy7  | DBLe11 | DBL72   | DBLe6  | Intron |        |        |      |  |
|         |                       |                    |                | 1799-4  | 4%         | Group A          |           |        |        |         |        |        |        |        |      |  |
|         |                       |                    |                | 1799-5  | 3%         | Group A          |           |        |        |         |        |        |        |        |      |  |
|         |                       |                    |                | 1799-6  | 3%         | Group B/C        |           |        |        |         |        |        |        |        |      |  |

**Figure S2**

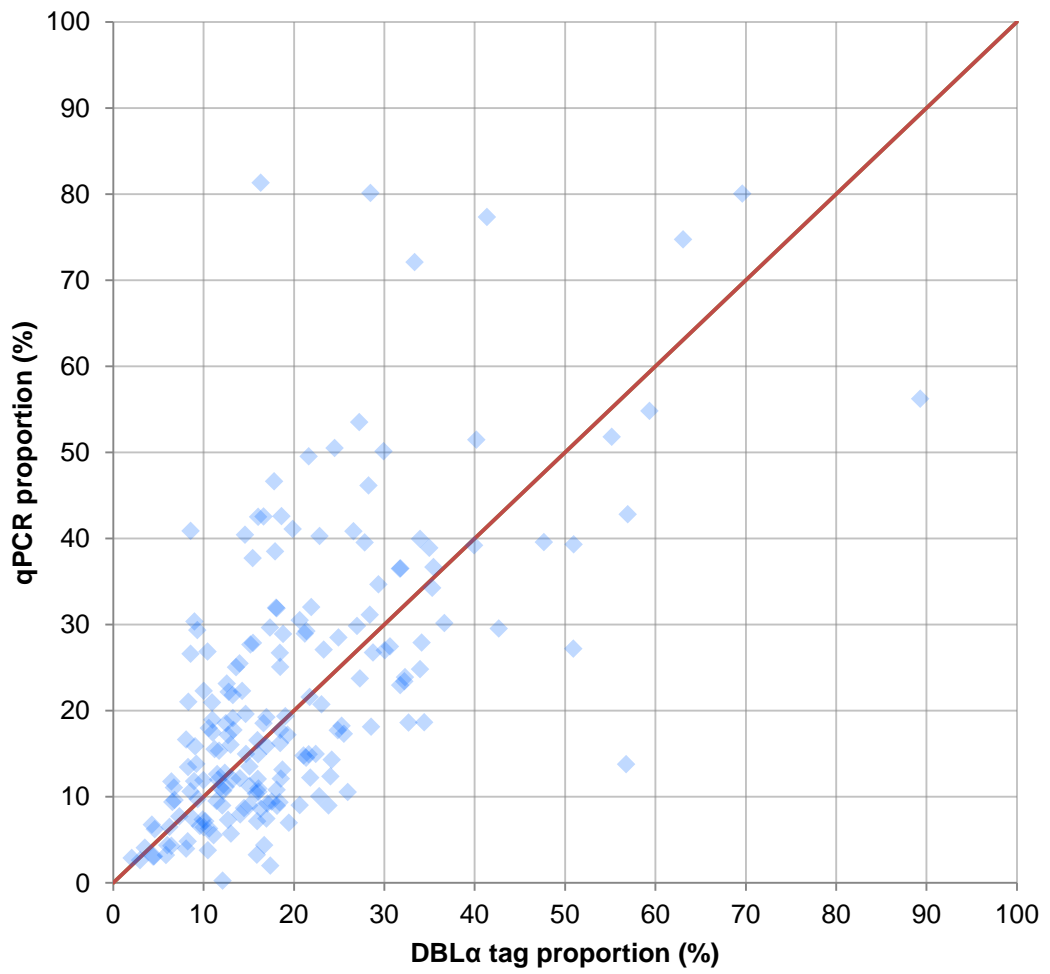

Figure S2: Plot of *var* transcript proportions determined by DBL $\alpha$ -tag analysis against qPCR reported transcript proportions. Red line added as a guide for perfect correlation.

**Figure S3**

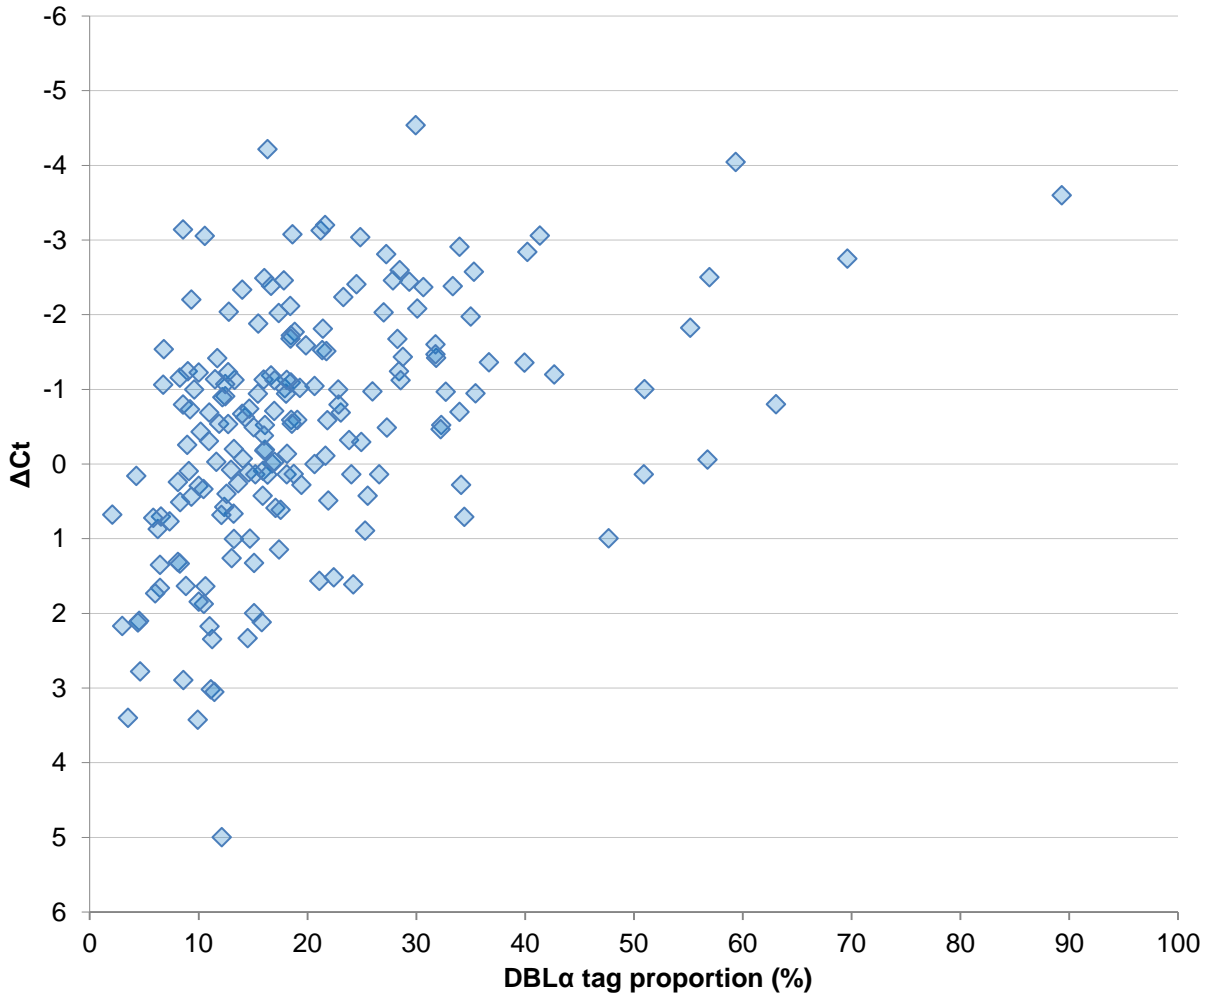

Figure S3: qPCR measured *var* transcript levels ( $\Delta$ Ct relative to endogenous control gene seryl-tRNA synthetase) plotted against the DBL $\alpha$ -tag determined transcript proportion.
